# Supplementary material for: Linking the Paul Coverdell National Acute Stroke Program to commercial claims to establish a framework for real-world longitudinal stroke research
Source: HighWire-hosted journal article supplement (doi:10.1136/svn-2021-001134), 2021-11-08
Supplement: svn-2021-001134supp001_data_supplement.pdf [file svn-2021-001134supp001_data_supplement.pdf]

## **Appendix**

**Linking the Paul Coverdell National Acute Stroke Program to commercial claims for real-world stroke research**

## Table of Contents

|                                                                                                                                                                                                                                                                                        |    |
|----------------------------------------------------------------------------------------------------------------------------------------------------------------------------------------------------------------------------------------------------------------------------------------|----|
| Table 1. Presence of PCNASP elements over calendar time.....                                                                                                                                                                                                                           | 4  |
| Table 2. Comparison of claims variables between beneficiaries in Optum with versus without successful PCNASP-linkage in patients less than 65 years and 65-year old and older .....                                                                                                    | 5  |
| Table 3. Comparison of claims variables between beneficiaries in Optum with versus without successful PCNASP-linkage in commercially-insured and Medicare Advantage insured patients .....                                                                                             | 8  |
| Table 4. Assessment of discordance among selected variables from the PCNASP and claims data among linked patients less than 65 years and 65-year old and older .....                                                                                                                   | 11 |
| Table 5. Assessment of discordance among selected variables from the PCNASP and claims data among linked commercially-insured and Medicare Advantage insured patients .....                                                                                                            | 12 |
| Table 6. Percentage of missingness for PCNASP elements .....                                                                                                                                                                                                                           | 13 |
| Figure 1. Antihypertensive and lipid-lowering medication use prior and subsequent to index stroke hospitalization as measured in PCNASP and in claims at 90 days pre-stroke and 90 days post discharge among linked patients less than 65 years and 65-year old and older .....        | 14 |
| Figure 2. Antihypertensive and lipid-lowering medication use prior and subsequent to index stroke hospitalization as measured in PCNASP and in claims at 90 days pre-stroke and 90 days post discharge among linked commercially-insured and Medicare Advantage insured patients ..... | 15 |

**Table 1. Presence of PCNASP elements over calendar time**

|                                                                | 2007 | 2010 | 2012 | 2014 | 2015 |
|----------------------------------------------------------------|------|------|------|------|------|
| <b>Comorbidities<sup>1</sup></b>                               |      |      |      |      |      |
| Hypertension                                                   | X    | X    | X    | X    | X    |
| Diabetes mellitus                                              | X    | X    | X    | X    | X    |
| Dyslipidemia                                                   | X    | X    | X    | X    | X    |
| Prior ischemic stroke                                          | X    | X    | X    | X    | X    |
| Prior transient ischemic attack                                | X    | X    | X    | X    | X    |
| History of atrial fibrillation                                 | X    | X    | X    | X    | X    |
| Carotid stenosis                                               | X    | X    | X    | X    | X    |
| Ischemic heart disease                                         | X    | X    | X    | X    | X    |
| Peripheral vascular disease                                    | X    | X    | X    | X    | X    |
| Congestive heart failure                                       | X    | X    | X    | X    | X    |
| Chronic kidney disease                                         |      |      | X    | X    | X    |
| Obesity                                                        |      | X    | X    | X    | X    |
| Smoking                                                        | X    | X    | X    | X    | X    |
| Drug or alcohol abuse                                          |      |      | X    | X    | X    |
| Depression                                                     |      | X    | X    | X    | X    |
| <b>Medications reported upon admission</b>                     |      |      |      |      |      |
| Antihypertensive drugs <sup>2</sup>                            | X    | X    | X    | X    | X    |
| Lipid-lowering drugs <sup>3</sup>                              | X    | X    | X    | X    | X    |
| <b>Stroke severity and functional information at discharge</b> |      |      |      |      |      |
| NIH Stroke Scale                                               | X    | X    | X    | X    | X    |
| Ambulatory status at discharge                                 | X    | X    | X    | X    | X    |
| <b>Medications prescribed at discharge</b>                     |      |      |      |      |      |
| Antihypertensive drugs <sup>2</sup>                            | X    | X    | X    | X    | X    |
| Statins                                                        | X    | X    | X    | X    | X    |

1. Based on recorded medical history during stroke hospitalization

2. Antihypertensive drugs: includes ACE-inhibitors, ARBs, beta-blockers, calcium channel blockers, thiazide diuretics, loop diuretics, and other antihypertensives

3. Lipid-lowering drugs: includes statins or other lipid-lowering medications.

**Table 2. Comparison of claims variables between beneficiaries in Optum with versus without successful PCNASP-linkage in patients less than 65 years and 65-year old and older**

| Patient characteristics                          | Patients less than 65 years  |                                 |                            | Patients 65 year-old and older |                                 |                            |
|--------------------------------------------------|------------------------------|---------------------------------|----------------------------|--------------------------------|---------------------------------|----------------------------|
|                                                  | Linked<br>(n=1,597)<br>N (%) | Unlinked<br>(n=22,838)<br>N (%) | Standardized<br>difference | Linked<br>(n=4,047)<br>N (%)   | Unlinked<br>(n=76,058)<br>N (%) | Standardized<br>difference |
| <b>Demographics</b>                              |                              |                                 |                            |                                |                                 |                            |
| Age, mean (SD)                                   | 54.4 (8.3)                   | 54.2 (8.4)                      | 0.03                       | 75.8 (6.3)                     | 78.0 (6.7)                      | -0.33                      |
| Female                                           | 688 (43.1)                   | 9375 (41.1)                     | 0.04                       | 2109 (52.1)                    | 42446 (55.8)                    | -0.07                      |
| <b>Comorbidities<sup>1</sup></b>                 |                              |                                 |                            |                                |                                 |                            |
| Combined comorbidity index, mean (SD)            | 0.8 (2.1)                    | 0.8 (2.0)                       | 0.02                       | 1.6 (2.5)                      | 1.7 (2.5)                       | -0.03                      |
| Hypertension                                     | 924 (57.9)                   | 11900 (52.1)                    | 0.12                       | 2942 (72.7)                    | 52775 (69.4)                    | 0.07                       |
| Diabetes                                         | 520 (32.6)                   | 6876 (30.1)                     | 0.05                       | 1454 (35.9)                    | 25088 (33.0)                    | 0.06                       |
| Dyslipidemia                                     | 628 (39.3)                   | 8364 (36.6)                     | 0.06                       | 2082 (51.5)                    | 35220 (46.3)                    | 0.10                       |
| Prior ischemic stroke                            | 344 (21.5)                   | 4108 (18.0)                     | 0.09                       | 848 (21.0)                     | 13744 (18.1)                    | 0.07                       |
| Prior transient ischemic attack                  | 148 (9.3)                    | 1967 (8.6)                      | 0.02                       | 378 (9.3)                      | 6835 (9.0)                      | 0.01                       |
| History of atrial fibrillation                   | 96 (6.0)                     | 1218 (5.3)                      | 0.03                       | 724 (17.9)                     | 16166 (21.3)                    | -0.08                      |
| Carotid stenosis                                 | 82 (5.1)                     | 1031 (4.5)                      | 0.03                       | 329 (8.1)                      | 5311 (7.0)                      | 0.04                       |
| Prior hemorrhagic stroke                         | 28 (1.8)                     | 251 (1.1)                       | 0.06                       | 55 (1.4)                       | 816 (1.1)                       | 0.03                       |
| Ischemic heart disease or procedure              | 242 (15.2)                   | 3398 (14.9)                     | 0.01                       | 1099 (27.2)                    | 19576 (25.7)                    | 0.03                       |
| Peripheral vascular disease (PVD) or PVD surgery | 84 (5.3)                     | 1179 (5.2)                      | 0.00                       | 413 (10.2)                     | 8845 (11.6)                     | -0.05                      |
| Congestive heart failure                         | 151 (9.5)                    | 1747 (7.7)                      | 0.06                       | 635 (15.7)                     | 12740 (16.8)                    | -0.03                      |
| Chronic kidney disease                           | 122 (7.6)                    | 1499 (6.6)                      | 0.04                       | 577 (14.3)                     | 11839 (15.6)                    | -0.04                      |
| Chronic obstructive pulmonary disease            | 117 (7.3)                    | 1772 (7.8)                      | -0.02                      | 577 (14.3)                     | 11000 (14.5)                    | -0.01                      |
| Pneumonia                                        | 60 (3.8)                     | 892 (3.9)                       | -0.01                      | 286 (7.1)                      | 4998 (6.6)                      | 0.02                       |
| Dementia                                         | 33 (2.1)                     | 574 (2.5)                       | -0.03                      | 542 (13.4)                     | 11513 (15.1)                    | -0.05                      |
| Cancer or history of malignant neoplasm          | 85 (5.3)                     | 1422 (6.2)                      | -0.04                      | 576 (14.2)                     | 9906 (13.0)                     | 0.04                       |
| Obesity                                          | 225 (14.1)                   | 2820 (12.4)                     | 0.05                       | 586 (14.5)                     | 10537 (13.9)                    | 0.02                       |
| Smoking                                          | 186 (11.7)                   | 2500 (11.0)                     | 0.02                       | 269 (6.7)                      | 3911 (5.1)                      | 0.06                       |
| Alcohol abuse or dependence                      | 22 (1.4)                     | 453 (2.0)                       | -0.05                      | 54 (1.3)                       | 768 (1.0)                       | 0.03                       |
| Drug abuse or dependence                         | 31 (1.9)                     | 431 (1.9)                       | 0.00                       | 30 (0.7)                       | 560 (0.7)                       | 0.00                       |
| Depression                                       | 153 (9.6)                    | 2234 (9.8)                      | -0.01                      | 403 (10.0)                     | 6960 (9.2)                      | 0.03                       |
| <b>Medication use<sup>1</sup></b>                |                              |                                 |                            |                                |                                 |                            |
| Any antihypertensives <sup>2</sup>               | 910 (57.0)                   | 11851 (51.9)                    | 0.10                       | 2527 (62.4)                    | 50668 (66.6)                    | -0.09                      |
| Angiotensin-converting enzyme inhibitors         | 430 (26.9)                   | 5987 (26.2)                     | 0.02                       | 1126 (27.8)                    | 22460 (29.5)                    | -0.04                      |
| Angiotensin II receptor blockers                 | 213 (13.3)                   | 2603 (11.4)                     | 0.06                       | 525 (13.0)                     | 10341 (13.6)                    | -0.02                      |
| Beta-blockers                                    | 473 (29.6)                   | 5959 (26.1)                     | 0.08                       | 1507 (37.2)                    | 29604 (38.9)                    | -0.03                      |
| Calcium channel blockers                         | 332 (20.8)                   | 4044 (17.7)                     | 0.08                       | 1029 (25.4)                    | 19897 (26.2)                    | -0.02                      |

|                                                               |              |              |       |              |              |       |
|---------------------------------------------------------------|--------------|--------------|-------|--------------|--------------|-------|
| Thiazide diuretics                                            | 354 (22.2)   | 4016 (17.6)  | 0.11  | 793 (19.6)   | 14135 (18.6) | 0.03  |
| Loop diuretics                                                | 166 (10.4)   | 2089 (9.2)   | 0.04  | 671 (16.6)   | 13432 (17.7) | -0.03 |
| Other antihypertensives                                       | 140 (8.8)    | 1578 (6.9)   | 0.07  | 318 (7.9)    | 6467 (8.5)   | -0.02 |
| Nitrates and other antianginal therapies                      | 77 (4.8)     | 898 (3.9)    | 0.04  | 312 (7.7)    | 5190 (6.8)   | 0.03  |
| Antiarrhythmics                                               | 25 (1.6)     | 324 (1.4)    | 0.01  | 80 (2.0)     | 1720 (2.3)   | -0.02 |
| Digoxin                                                       | 27 (1.7)     | 363 (1.6)    | 0.01  | 149 (3.7)    | 3966 (5.2)   | -0.07 |
| Any Lipid-lowering agents <sup>3</sup>                        | 527 (33.0)   | 6902 (30.2)  | 0.06  | 1617 (40.0)  | 29392 (38.6) | 0.03  |
| Statins                                                       | 493 (30.9)   | 6383 (28.0)  | 0.06  | 1523 (37.6)  | 27594 (36.3) | 0.03  |
| Other lipid-lowering agents                                   | 98 (6.1)     | 1316 (5.8)   | 0.02  | 242 (6.0)    | 3915 (5.2)   | 0.04  |
| Antiplatelets <sup>4</sup>                                    | 185 (11.6)   | 2038 (8.9)   | 0.09  | 509 (12.6)   | 8442 (11.1)  | 0.05  |
| Anticoagulants <sup>5</sup>                                   | 98 (6.1)     | 1284 (5.6)   | 0.02  | 393 (9.7)    | 7879 (10.4)  | -0.02 |
| Warfarin                                                      | 78 (4.9)     | 998 (4.4)    | 0.02  | 305 (7.5)    | 6780 (8.9)   | -0.05 |
| Direct oral anticoagulants                                    | 11 (0.7)     | 195 (0.9)    | -0.02 | 83 (2.1)     | 1003 (1.3)   | 0.06  |
| Heparin, LMWH, or fondaparinux                                | 21 (1.3)     | 274 (1.2)    | 0.01  | 45 (1.1)     | 661 (0.9)    | 0.02  |
| Insulin                                                       | 190 (11.9)   | 2606 (11.4)  | 0.02  | 432 (10.7)   | 6331 (8.3)   | 0.08  |
| Non-insulin glucose-lowering medications                      | 314 (19.7)   | 4029 (17.6)  | 0.05  | 720 (17.8)   | 13400 (17.6) | 0.00  |
| Antidepressants <sup>6</sup>                                  | 334 (20.9)   | 4623 (20.2)  | 0.02  | 811 (20.0)   | 14523 (19.1) | 0.02  |
| <b>Measures of healthcare utilization<sup>1</sup></b>         |              |              |       |              |              |       |
| Any hospitalization, %                                        | 295 (18.5)   | 3419 (15.0)  | 0.09  | 920 (22.7)   | 14043 (18.5) | 0.11  |
| Number of any hospitalization, mean (SD)                      | 0.3 (0.7)    | 0.2 (0.7)    | 0.06  | 0.3 (0.7)    | 0.3 (0.7)    | 0.08  |
| Any hospitalization within prior 30 days, %                   | 125 (7.8)    | 1333 (5.8)   | 0.08  | 342 (8.5)    | 5093 (6.7)   | 0.07  |
| N hospital days, mean (SD)                                    | 1.7 (6.6)    | 1.5 (6.3)    | 0.03  | 2.0 (5.8)    | 1.6 (5.3)    | 0.08  |
| Number of emergency department (ED) visits, mean (SD)         | 307 (19.2)   | 3484 (15.3)  | 0.11  | 1671 (41.3)  | 25657 (33.7) | 0.16  |
| Number of any physician visit, mean (SD)                      | 9.9 (15.3)   | 8.9 (14.3)   | 0.07  | 14.0 (18.5)  | 10.9 (16.1)  | 0.18  |
| Total N distinct pharmacological agents prescribed, mean (SD) | 6.3 (5.7)    | 5.9 (5.9)    | 0.06  | 6.6 (6.1)    | 6.4 (5.5)    | 0.03  |
| <b>Laboratory values<sup>1</sup></b>                          |              |              |       |              |              |       |
| LDL, mg/dl, mean (SD)                                         | 111.8 (57.2) | 108.1 (45.7) | 0.07  | 77.1 (47.5)  | 101.1 (38.9) | -0.55 |
| LDL, N (%)                                                    | 100 (6.3)    | 2043 (9.0)   | -0.10 | 23 (0.6)     | 428 (0.6)    | 0.00  |
| Total cholesterol, mg/dl, mean (SD)                           | 203.7 (62.0) | 195.3 (49.0) | 0.15  | 180.2 (59.0) | 183.9 (46.5) | -0.07 |
| Total cholesterol, N (%)                                      | 99 (6.2)     | 2080 (9.1)   | -0.11 | 21 (0.5)     | 434 (0.6)    | -0.01 |
| INR, mean (SD)                                                | 1.7 (1.1)    | 1.6 (0.9)    | 0.03  | 1.6 (0.5)    | 1.8 (1.1)    | -0.22 |
| INR, N (%)                                                    | 14 (0.9)     | 303 (1.3)    | -0.04 | 5 (0.1)      | 81 (0.1)     | 0.01  |
| Creatinine, mg/dl, mean (SD)                                  | 1.1 (0.5)    | 1.1 (2.2)    | -0.04 | 1.0 (0.3)    | 1.2 (0.8)    | -0.20 |
| Creatinine, N (%)                                             | 141 (8.8)    | 2786 (12.2)  | -0.11 | 30 (0.7)     | 607 (0.8)    | -0.01 |
| HbA1c, %, mean (SD)                                           | 8.1 (2.5)    | 7.9 (2.3)    | 0.08  | 8.5 (2.4)    | 7.3 (1.8)    | 0.57  |
| HbA1c, N (%)                                                  | 79 (5.0)     | 1279 (5.6)   | -0.03 | 11 (0.3)     | 251 (0.3)    | -0.01 |
| <b>Characteristics of stroke hospitalization</b>              |              |              |       |              |              |       |
| Length of stay of index hospitalization, mean (SD)            | 5.3 (4.5)    | 5.9 (7.2)    | -0.11 | 5.8 (4.7)    | 5.9 (6.7)    | -0.02 |
| Discharge status                                              |              |              |       |              |              |       |
| Home                                                          | 1154 (72.3)  | 15955 (69.9) | 0.05  | 1537 (38.0)  | 25236 (33.2) | 0.10  |

|                                    |           |             |       |            |              |       |
|------------------------------------|-----------|-------------|-------|------------|--------------|-------|
| Home health care                   | 66 (4.1)  | 831 (3.6)   | 0.03  | 614 (15.2) | 9545 (12.6)  | 0.08  |
| Rehabilitation facility            | 44 (2.8)  | 726 (3.2)   | -0.02 | 436 (10.8) | 7870 (10.4)  | 0.01  |
| Skilled nursing facility           | 62 (3.9)  | 836 (3.7)   | 0.01  | 873 (21.6) | 18930 (24.9) | -0.08 |
| Other acute inpatient facility     | 153 (9.6) | 2667 (11.7) | -0.07 | 178 (4.4)  | 4034 (5.3)   | -0.04 |
| Hospice                            | 11 (0.7)  | 69 (0.3)    | 0.06  | 179 (4.4)  | 4029 (5.3)   | -0.04 |
| In-hospital mortality <sup>7</sup> | 25 (1.6)  | 254 (1.1)   | 0.04  | 8 (0.2)    | 262 (0.3)    | -0.03 |

Values are N (%) unless otherwise specified. SD: standard deviation; LMWH: low-molecular-weight heparin; LDL: low-density lipoprotein; INR: international normalised ratio; HbA1c: hemoglobin A1c

1 Unless otherwise specified, measured during the six months preceding the index stroke hospitalization

2 Includes ACE-inhibitors, ARBs, beta-blockers, calcium channel blockers, thiazide diuretics, loop diuretics, and other antihypertensives

3 Includes statins or other lipid-lowering medications

4 Includes aspirin, clopidogrel, prasugrel, ticagrelor, dipyridamole, aspirin-dipyridamole, ticlopidine

5 Includes warfarin, dabigatran, rivaroxaban, apixaban, edoxaban, heparin, dalteparin, enoxaparin, tinzaparin, fondaparinux, argatroban, desirudin, lipirudin

6 Includes selective serotonin reuptake inhibitors (SSRIs) and non-SSRI antidepressants

7 Information on mortality is available in Optum through linkage with the Social Security Administration Death Master File. This capture is limited by a policy change in 2011 concerning the extent of the Social Security Administration disclosure of death records received from states (Important notice: change in public death master file records. 2011; <https://classic.ntis.gov/assets/pdf/import-change-dmf.pdf>).

**Table 3. Comparison of claims variables between beneficiaries in Optum with versus without successful PCNASP-linkage in commercially-insured and Medicare Advantage insured patients**

| Patient characteristics                          | Commercially insured patients |                                 |                            | Medicare Advantage insured patients |                                 |                            |
|--------------------------------------------------|-------------------------------|---------------------------------|----------------------------|-------------------------------------|---------------------------------|----------------------------|
|                                                  | Linked<br>(n=1,495)<br>N (%)  | Unlinked<br>(n=25,824)<br>N (%) | Standardized<br>difference | Linked<br>(n=4,149)<br>N (%)        | Unlinked<br>(n=73,072)<br>N (%) | Standardized<br>difference |
| <b>Demographics</b>                              |                               |                                 |                            |                                     |                                 |                            |
| Age, mean (SD)                                   | 57.1 (11.5)                   | 60.2 (13.4)                     | -0.25                      | 74.3 (8.0)                          | 76.8 (8.3)                      | -0.31                      |
| Female                                           | 614 (41.1)                    | 10810 (41.9)                    | -0.02                      | 2183 (52.6)                         | 41011 (56.1)                    | -0.07                      |
| <b>Comorbidities<sup>1</sup></b>                 |                               |                                 |                            |                                     |                                 |                            |
| Combined comorbidity index, mean (SD)            | 0.7 (2.1)                     | 0.8 (2.0)                       | -0.02                      | 1.6 (2.5)                           | 1.7 (2.5)                       | -0.04                      |
| Hypertension                                     | 806 (53.9)                    | 13353 (51.7)                    | 0.04                       | 3060 (73.8)                         | 51322 (70.2)                    | 0.08                       |
| Diabetes                                         | 406 (27.2)                    | 6621 (25.6)                     | 0.03                       | 1568 (37.8)                         | 25343 (34.7)                    | 0.06                       |
| Dyslipidemia                                     | 544 (36.4)                    | 9119 (35.3)                     | 0.02                       | 2166 (52.2)                         | 34465 (47.2)                    | 0.10                       |
| Prior ischemic stroke                            | 280 (18.7)                    | 4295 (16.6)                     | 0.05                       | 912 (22.0)                          | 13557 (18.6)                    | 0.09                       |
| Prior transient ischemic attack                  | 126 (8.4)                     | 2213 (8.6)                      | -0.01                      | 400 (9.6)                           | 6589 (9.0)                      | 0.02                       |
| History of atrial fibrillation                   | 113 (7.6)                     | 2252 (8.7)                      | -0.04                      | 707 (17.0)                          | 15132 (20.7)                    | -0.09                      |
| Carotid stenosis                                 | 74 (5.0)                      | 1239 (4.8)                      | 0.01                       | 337 (8.1)                           | 5103 (7.0)                      | 0.04                       |
| Prior hemorrhagic stroke                         | 19 (1.3)                      | 276 (1.1)                       | 0.02                       | 64 (1.5)                            | 791 (1.1)                       | 0.04                       |
| Ischemic heart disease or procedure              | 213 (14.3)                    | 3910 (15.1)                     | -0.03                      | 1128 (27.2)                         | 19064 (26.1)                    | 0.02                       |
| Peripheral vascular disease (PVD) or PVD surgery | 67 (4.5)                      | 1426 (5.5)                      | -0.05                      | 430 (10.4)                          | 8598 (11.8)                     | -0.04                      |
| Congestive heart failure                         | 126 (8.4)                     | 1937 (7.5)                      | 0.03                       | 660 (15.9)                          | 12550 (17.2)                    | -0.03                      |
| Chronic kidney disease                           | 93 (6.2)                      | 1593 (6.2)                      | 0.00                       | 606 (14.6)                          | 11745 (16.1)                    | -0.04                      |
| Chronic obstructive pulmonary disease            | 78 (5.2)                      | 1790 (6.9)                      | -0.07                      | 616 (14.9)                          | 10982 (15.0)                    | -0.01                      |
| Pneumonia                                        | 53 (3.6)                      | 956 (3.7)                       | -0.01                      | 293 (7.1)                           | 4934 (6.8)                      | 0.01                       |
| Dementia                                         | 43 (2.9)                      | 1204 (4.7)                      | -0.09                      | 532 (12.8)                          | 10883 (14.9)                    | -0.06                      |
| Cancer or history of malignant neoplasm          | 107 (7.2)                     | 2239 (8.7)                      | -0.06                      | 554 (13.4)                          | 9089 (12.4)                     | 0.03                       |
| Obesity                                          | 178 (11.9)                    | 2581 (10.0)                     | 0.06                       | 633 (15.3)                          | 10776 (14.8)                    | 0.01                       |
| Smoking                                          | 140 (9.4)                     | 1979 (7.7)                      | 0.06                       | 315 (7.6)                           | 4432 (6.1)                      | 0.06                       |
| Alcohol abuse or dependence                      | 14 (0.9)                      | 347 (1.3)                       | -0.04                      | 62 (1.5)                            | 874 (1.2)                       | 0.03                       |
| Drug abuse or dependence                         | 15 (1.0)                      | 229 (0.9)                       | 0.01                       | 46 (1.1)                            | 762 (1.0)                       | 0.01                       |
| Depression                                       | 109 (7.3)                     | 1910 (7.4)                      | 0.00                       | 447 (10.8)                          | 7284 (10.0)                     | 0.03                       |
| <b>Medication use<sup>1</sup></b>                |                               |                                 |                            |                                     |                                 |                            |
| Any antihypertensives <sup>2</sup>               | 812 (54.3)                    | 13856 (53.7)                    | 0.01                       | 2625 (63.3)                         | 48663 (66.6)                    | -0.07                      |
| Angiotensin-converting enzyme inhibitors         | 356 (23.8)                    | 6273 (24.3)                     | -0.01                      | 1200 (28.9)                         | 22174 (30.4)                    | -0.03                      |
| Angiotensin II receptor blockers                 | 208 (13.9)                    | 3437 (13.3)                     | 0.02                       | 530 (12.8)                          | 9507 (13.0)                     | -0.01                      |
| Beta-blockers                                    | 414 (27.7)                    | 7015 (27.2)                     | 0.01                       | 1566 (37.7)                         | 28548 (39.1)                    | -0.03                      |
| Calcium channel blockers                         | 283 (18.9)                    | 4845 (18.8)                     | 0.00                       | 1078 (26.0)                         | 19096 (26.1)                    | 0.00                       |



|                                                               |              |              |       |              |              |       |
|---------------------------------------------------------------|--------------|--------------|-------|--------------|--------------|-------|
| Thiazide diuretics                                            | 305 (20.4)   | 4636 (18.0)  | 0.06  | 842 (20.3)   | 13515 (18.5) | 0.05  |
| Loop diuretics                                                | 129 (8.6)    | 2474 (9.6)   | -0.03 | 708 (17.1)   | 13047 (17.9) | -0.02 |
| Other antihypertensives                                       | 100 (6.7)    | 1509 (5.8)   | 0.03  | 358 (8.6)    | 6536 (8.9)   | -0.01 |
| Nitrates and other antianginal therapies                      | 55 (3.7)     | 919 (3.6)    | 0.01  | 334 (8.1)    | 5169 (7.1)   | 0.04  |
| Antiarrhythmics                                               | 22 (1.5)     | 433 (1.7)    | -0.02 | 83 (2.0)     | 1611 (2.2)   | -0.01 |
| Digoxin                                                       | 30 (2.0)     | 653 (2.5)    | -0.04 | 146 (3.5)    | 3676 (5.0)   | -0.07 |
| Any Lipid-lowering agents <sup>3</sup>                        | 480 (32.1)   | 8007 (31.0)  | 0.02  | 1664 (40.1)  | 28287 (38.7) | 0.03  |
| Statins                                                       | 455 (30.4)   | 7413 (28.7)  | 0.04  | 1561 (37.6)  | 26564 (36.4) | 0.03  |
| Other lipid-lowering agents                                   | 86 (5.8)     | 1396 (5.4)   | 0.02  | 254 (6.1)    | 3835 (5.3)   | 0.04  |
| Antiplatelets <sup>4</sup>                                    | 160 (10.7)   | 2250 (8.7)   | 0.07  | 534 (12.9)   | 8230 (11.3)  | 0.05  |
| Anticoagulants <sup>5</sup>                                   | 89 (6.0)     | 1692 (6.6)   | -0.02 | 402 (9.7)    | 7471 (10.2)  | -0.02 |
| Warfarin                                                      | 68 (4.6)     | 1338 (5.2)   | -0.03 | 315 (7.6)    | 6440 (8.8)   | -0.04 |
| Direct oral anticoagulants                                    | 12 (0.8)     | 259 (1.0)    | -0.02 | 82 (2.0)     | 939 (1.3)    | 0.05  |
| Heparin, LMWH, or fondaparinux                                | 20 (1.3)     | 286 (1.1)    | 0.02  | 46 (1.1)     | 649 (0.9)    | 0.02  |
| Insulin                                                       | 134 (9.0)    | 2138 (8.3)   | 0.02  | 488 (11.8)   | 6799 (9.3)   | 0.08  |
| Non-insulin glucose-lowering medications                      | 253 (16.9)   | 4143 (16.0)  | 0.02  | 781 (18.8)   | 13286 (18.2) | 0.02  |
| Antidepressants <sup>6</sup>                                  | 269 (18.0)   | 4375 (16.9)  | 0.03  | 876 (21.1)   | 14771 (20.2) | 0.02  |
| <b>Measures of healthcare utilization<sup>1</sup></b>         |              |              |       |              |              |       |
| Any hospitalization, %                                        | 258 (17.3)   | 3221 (12.5)  | 0.13  | 957 (23.1)   | 14241 (19.5) | 0.09  |
| Number of any hospitalization, mean (SD)                      | 0.2 (0.6)    | 0.2 (0.6)    | 0.11  | 0.3 (0.7)    | 0.3 (0.7)    | 0.07  |
| Any hospitalization within prior 30 days, %                   | 109 (7.3)    | 1139 (4.4)   | 0.12  | 358 (8.6)    | 5287 (7.2)   | 0.05  |
| N hospital days, mean (SD)                                    | 1.4 (5.6)    | 1.2 (5.6)    | 0.04  | 2.2 (6.2)    | 1.7 (5.5)    | 0.07  |
| Number of emergency department (ED) visits, mean (SD)         | 116 (7.8)    | 1434 (5.6)   | 0.09  | 1862 (44.9)  | 27707 (37.9) | 0.14  |
| Number of any physician visit, mean (SD)                      | 8.2 (11.8)   | 8.1 (11.4)   | 0.01  | 14.5 (19.2)  | 11.3 (16.9)  | 0.18  |
| Total N distinct pharmacological agents prescribed, mean (SD) | 5.6 (5.3)    | 5.5 (5.3)    | 0.02  | 6.8 (6.2)    | 6.6 (5.6)    | 0.04  |
| <b>Laboratory values<sup>1</sup></b>                          |              |              |       |              |              |       |
| LDL, mg/dl, mean (SD)                                         | 106.3 (58.1) | 107.1 (44.8) | -0.02 | 86.8 (19.2)  | 100.3 (38.7) | -0.44 |
| LDL, N (%)                                                    | 117 (7.8)    | 2417 (9.4)   | -0.05 | 6 (0.1)      | 54 (0.1)     | 0.02  |
| Total cholesterol, mg/dl, mean (SD)                           | 201.9 (62.4) | 193.6 (48.7) | 0.15  | 156.2 (25.8) | 179.4 (49.2) | -0.59 |
| Total cholesterol, N (%)                                      | 114 (7.6)    | 2460 (9.5)   | -0.07 | 6 (0.1)      | 54 (0.1)     | 0.02  |
| INR, mean (SD)                                                | 1.5 (0.9)    | 1.7 (0.9)    | -0.18 | 2.4 (1.1)    | 1.9 (0.9)    | 0.56  |
| INR, N (%)                                                    | 16 (1.1)     | 376 (1.5)    | -0.03 | 3 (0.1)      | 8 (0.0)      | 0.03  |
| Creatinine, mg/dl, mean (SD)                                  | 1.1 (0.5)    | 1.1 (2.1)    | -0.05 | 1.1 (0.3)    | 1.1 (0.3)    | 0.04  |
| Creatinine, N (%)                                             | 159 (10.6)   | 3317 (12.8)  | -0.07 | 12 (0.3)     | 76 (0.1)     | 0.04  |
| HbA1c, %, mean (SD)                                           | 8.2 (2.5)    | 7.8 (2.3)    | 0.13  | 8.5 (2.2)    | 7.0 (1.4)    | 0.78  |
| HbA1c, N (%)                                                  | 86 (5.8)     | 1498 (5.8)   | 0.00  | 4 (0.1)      | 32 (0.0)     | 0.02  |
| <b>Characteristics of stroke hospitalization</b>              |              |              |       |              |              |       |
| Length of stay of index hospitalization, mean (SD)            | 5.1 (4.0)    | 5.9 (7.0)    | -0.13 | 5.9 (4.9)    | 6.0 (6.7)    | -0.02 |
| Discharge status                                              |              |              |       |              |              |       |
| Home                                                          | 1155 (77.3)  | 18770 (72.7) | 0.11  | 1536 (37.0)  | 22421 (30.7) | 0.13  |

|                                    |            |             |       |            |              |       |
|------------------------------------|------------|-------------|-------|------------|--------------|-------|
| Home health care                   | 5 (0.3)    | 37 (0.1)    | 0.04  | 675 (16.3) | 10339 (14.2) | 0.06  |
| Rehabilitation facility            | 8 (0.5)    | 104 (0.4)   | 0.02  | 472 (11.4) | 8492 (11.6)  | -0.01 |
| Skilled nursing facility           | 8 (0.5)    | 65 (0.3)    | 0.05  | 927 (22.3) | 19701 (27.0) | -0.11 |
| Other acute inpatient facility     | 218 (14.6) | 4697 (18.2) | -0.10 | 113 (2.7)  | 2004 (2.7)   | 0.00  |
| Hospice                            | 2 (0.1)    | 12 (0.1)    | 0.03  | 188 (4.5)  | 4086 (5.6)   | -0.05 |
| In-hospital mortality <sup>7</sup> | 33 (2.2)   | 511 (2.0)   | 0.02  | 0 (0.0)    | 5 (0.0)      | -0.01 |

Values are N (%) unless otherwise specified. SD: standard deviation; LMWH: low-molecular-weight heparin; LDL: low-density lipoprotein; INR: international normalised ratio; HbA1c: hemoglobin A1c

1 Unless otherwise specified, measured during the six months preceding the index stroke hospitalization

2 Includes ACE-inhibitors, ARBs, beta-blockers, calcium channel blockers, thiazide diuretics, loop diuretics, and other antihypertensives

3 Includes statins or other lipid-lowering medications

4 Includes aspirin, clopidogrel, prasugrel, ticagrelor, dipyridamole, aspirin-dipyridamole, ticlopidine

5 Includes warfarin, dabigatran, rivaroxaban, apixaban, edoxaban, heparin, dalteparin, enoxaparin, tinzaparin, fondaparinux, argatroban, desirudin, lipirudin

6 Includes selective serotonin reuptake inhibitors (SSRIs) and non-SSRI antidepressants

7 Information on mortality is available in Optum through linkage with the Social Security Administration Death Master File. This capture is limited by a policy change in 2011 concerning the extent of the Social Security Administration disclosure of death records received from states (Important notice: change in public death master file records. 2011; <https://classic.ntis.gov/assets/pdf/import-change-dmf.pdf>).

**Table 4. Assessment of discordance among selected variables from the PCNASP and claims data among linked patients less than 65 years and 65-year old and older**

|                                                                            | Patients less than 65 years      |                                  |                        |                     | Patients 65-year old and older   |                                  |                        |                     |
|----------------------------------------------------------------------------|----------------------------------|----------------------------------|------------------------|---------------------|----------------------------------|----------------------------------|------------------------|---------------------|
|                                                                            | PCNASP-based variables (n=1,597) | Claims-based variables (n=1,597) | McNemar's test p-value | Absolute difference | PCNASP-based variables (n=4,047) | Claims-based variables (n=4,047) | McNemar's test p-value | Absolute difference |
| <b>Comorbidities<sup>1</sup>, N (%)</b>                                    |                                  |                                  |                        |                     |                                  |                                  |                        |                     |
| Hypertension                                                               | 1053 (66.1)                      | 924 (57.9)                       | 0.00                   | 8.2                 | 2968 (73.6)                      | 2942 (72.7)                      | 0.31                   | 0.9                 |
| Diabetes mellitus                                                          | 532 (33.5)                       | 520 (32.6)                       | 0.33                   | 0.9                 | 1248 (31.1)                      | 1454 (35.9)                      | 0.00                   | 4.8                 |
| Dyslipidemia                                                               | 612 (38.5)                       | 628 (39.3)                       | 0.46                   | 0.9                 | 1978 (49.2)                      | 2082 (51.5)                      | 0.01                   | 2.3                 |
| Prior ischemic stroke                                                      | 228 (16.0)                       | 344 (21.5)                       | 0.00                   | 5.5                 | 847 (24.3)                       | 848 (21.0)                       | 0.00                   | 3.4                 |
| Prior transient ischemic attack                                            | 96 (6.7)                         | 148 (9.3)                        | 0.03                   | 2.6                 | 310 (8.7)                        | 378 (9.3)                        | 0.46                   | 0.6                 |
| History of atrial fibrillation                                             | 122 (7.6)                        | 96 (6.0)                         | 0.01                   | 1.6                 | 1033 (25.5)                      | 724 (17.9)                       | 0.00                   | 7.6                 |
| Carotid stenosis                                                           | 34 (2.1)                         | 82 (5.1)                         | 0.00                   | 3.0                 | 188 (4.7)                        | 329 (8.1)                        | 0.00                   | 3.4                 |
| Ischemic heart disease                                                     | 256 (16.1)                       | 242 (15.2)                       | 0.31                   | 1.0                 | 1067 (26.6)                      | 1099 (27.2)                      | 0.35                   | 0.6                 |
| Peripheral vascular disease                                                | 50 (3.2)                         | 84 (5.3)                         | 0.00                   | 2.1                 | 265 (6.6)                        | 413 (10.2)                       | 0.00                   | 3.6                 |
| Congestive heart failure                                                   | 93 (5.9)                         | 151 (9.5)                        | 0.00                   | 3.6                 | 356 (8.9)                        | 635 (15.7)                       | 0.00                   | 6.8                 |
| Chronic kidney disease                                                     | 39 (16.7)                        | 122 (7.6)                        | 0.00                   | 9.0                 | 99 (10.1)                        | 577 (14.3)                       | 0.00                   | 4.1                 |
| Obesity                                                                    | 194 (54.0)                       | 225 (14.1)                       | 0.00                   | 40.0                | 430 (35.3)                       | 586 (14.5)                       | 0.00                   | 20.8                |
| Smoking                                                                    | 463 (29.1)                       | 186 (11.7)                       | 0.00                   | 17.5                | 561 (14.0)                       | 269 (6.7)                        | 0.00                   | 7.4                 |
| Drug or alcohol abuse                                                      | 10 (4.7)                         | 31 (1.9)                         | 0.81                   | 2.8                 | 22 (2.3)                         | 30 (0.7)                         | 0.86                   | 1.6                 |
| Depression                                                                 | 40 (4.1)                         | 153 (9.6)                        | 0.00                   | 5.5                 | 134 (6.2)                        | 403 (10.0)                       | 0.00                   | 3.7                 |
| <b>Stroke severity and functional information at discharge<sup>2</sup></b> |                                  |                                  |                        |                     |                                  |                                  |                        |                     |
| NIH Stroke Scale                                                           |                                  |                                  |                        |                     |                                  |                                  |                        |                     |
| mean (SD)                                                                  | 5.0 (6.4)                        | N/A                              | N/A                    | N/A                 | 6.6 (7.4)                        | N/A                              | N/A                    | N/A                 |
| median (IQR)                                                               | 3 (1-6)                          | N/A                              | N/A                    | N/A                 | 4 (1-9)                          | N/A                              | N/A                    | N/A                 |
| Ambulatory status at discharge                                             |                                  |                                  |                        |                     |                                  |                                  |                        |                     |
| Able to ambulate independently with or without device, N (%)               | 1020 (66.6)                      | N/A                              | N/A                    | N/A                 | 1678 (43.9)                      | N/A                              | N/A                    | N/A                 |

SD: standard deviation; NIH: National Institutes of Health; IQR: 25<sup>th</sup>-75<sup>th</sup> interquartile; N/A: not applicable

<sup>1</sup> Comorbidities in the PCNASP are based on recorded medical history during stroke hospitalization; comorbidities for in claims are based on ICD9 diagnoses recorded during the 183-day period prior to the stroke hospitalization. Comorbidities in the PCNASP were characterized by varying level of missingness: information on prior ischemic stroke, transient ischemic attack, obesity, chronic kidney disease, drug or alcohol abuse, and depression was missing for 13.0%, 11.6%, 72.1%, 78.6%, 79.6% and 44.7%, respectively; information on the other comorbidities was missing for <1%.

<sup>2</sup> Information on NIH Stroke Scale and Ambulatory status at discharge was missing for 28.9% and 5.2% patients, respectively.

**Table 5. Assessment of discordance among selected variables from the PCNASP and claims data among linked commercially-insured and Medicare Advantage insured patients**

|                                                                            | Commercially insured patients    |                                  |                        |                     | Medicare Advantage insured patients |                                  |                        |                     |
|----------------------------------------------------------------------------|----------------------------------|----------------------------------|------------------------|---------------------|-------------------------------------|----------------------------------|------------------------|---------------------|
|                                                                            | PCNASP-based variables (n=1,495) | Claims-based variables (n=1,495) | McNemar's test p-value | Absolute difference | PCNASP-based variables (n=4,149)    | Claims-based variables (n=4,149) | McNemar's test p-value | Absolute difference |
| <b>Comorbidities<sup>1</sup>, N (%)</b>                                    |                                  |                                  |                        |                     |                                     |                                  |                        |                     |
| Hypertension                                                               | 1005 (67.5)                      | 806 (53.9)                       | 0.00                   | 13.5                | 3016 (72.9)                         | 3060 (73.8)                      | 0.31                   | 0.8                 |
| Diabetes mellitus                                                          | 449 (30.3)                       | 406 (27.2)                       | 0.00                   | 3.1                 | 1331 (32.3)                         | 1568 (37.8)                      | 0.00                   | 5.5                 |
| Dyslipidemia                                                               | 598 (40.3)                       | 544 (36.4)                       | 0.01                   | 3.9                 | 1992 (48.2)                         | 2166 (52.2)                      | 0.01                   | 4.0                 |
| Prior ischemic stroke                                                      | 183 (13.3)                       | 280 (18.7)                       | 0.00                   | 5.5                 | 892 (25.3)                          | 912 (22.0)                       | 0.00                   | 3.3                 |
| Prior transient ischemic attack                                            | 100 (7.3)                        | 126 (8.4)                        | 0.17                   | 1.2                 | 306 (8.5)                           | 400 (9.6)                        | 0.22                   | 1.2                 |
| History of atrial fibrillation                                             | 163 (10.9)                       | 113 (7.6)                        | 0.00                   | 3.4                 | 992 (23.9)                          | 707 (17.0)                       | 0.00                   | 6.9                 |
| Carotid stenosis                                                           | 35 (2.4)                         | 74 (5.0)                         | 0.00                   | 2.6                 | 187 (4.5)                           | 337 (8.1)                        | 0.00                   | 3.6                 |
| Ischemic heart disease                                                     | 256 (17.3)                       | 213 (14.3)                       | 0.00                   | 3.0                 | 1067 (25.9)                         | 1128 (27.2)                      | 0.05                   | 1.3                 |
| Peripheral vascular disease                                                | 48 (3.3)                         | 67 (4.5)                         | 0.06                   | 1.2                 | 267 (6.5)                           | 430 (10.4)                       | 0.00                   | 3.9                 |
| Congestive heart failure                                                   | 82 (5.6)                         | 126 (8.4)                        | 0.00                   | 2.9                 | 367 (8.9)                           | 660 (15.9)                       | 0.00                   | 7.0                 |
| Chronic kidney disease                                                     | 26 (1.9)                         | 93 (6.2)                         | 0.00                   | 8.6                 | 112 (10.8)                          | 606 (14.6)                       | 0.00                   | 3.8                 |
| Obesity                                                                    | 149 (53.6)                       | 178 (11.9)                       | 0.00                   | 41.7                | 475 (36.6)                          | 633 (15.3)                       | 0.00                   | 21.3                |
| Smoking                                                                    | 360 (24.4)                       | 140 (9.4)                        | 0.00                   | 15.0                | 664 (16.1)                          | 315 (7.6)                        | 0.00                   | 8.5                 |
| Drug or alcohol abuse                                                      | 5 (3.2)                          | 15 (1.0)                         | 0.26                   | 2.2                 | 27 (2.7)                            | 46 (1.1)                         | 1.00                   | 1.6                 |
| Depression                                                                 | 30 (3.2)                         | 109 (7.3)                        | 0.00                   | 4.1                 | 144 (6.6)                           | 447 (10.8)                       | 0.00                   | 4.2                 |
| <b>Stroke severity and functional information at discharge<sup>2</sup></b> |                                  |                                  |                        |                     |                                     |                                  |                        |                     |
| NIH Stroke Scale                                                           |                                  |                                  |                        |                     |                                     |                                  |                        |                     |
| mean (SD)                                                                  | 4.8 (6.4)                        | N/A                              | N/A                    | N/A                 | 6.6 (7.4)                           | N/A                              | N/A                    | N/A                 |
| median (IQR)                                                               | 2 (1-6)                          | N/A                              | N/A                    | N/A                 | 4 (1-9)                             | N/A                              | N/A                    | N/A                 |
| Ambulatory status at discharge                                             |                                  |                                  |                        |                     |                                     |                                  |                        |                     |
| Able to ambulate independently with or without device, N (%)               | 995 (69.5)                       | N/A                              | N/A                    | N/A                 | 1703 (43.4)                         | N/A                              | N/A                    | N/A                 |

SD: standard deviation; NIH: National Institutes of Health; IQR: 25<sup>th</sup>-75<sup>th</sup> interquartile; N/A: not applicable

<sup>1</sup> Comorbidities in the PCNASP are based on recorded medical history during stroke hospitalization; comorbidities for in claims are based on ICD9 diagnoses recorded during the 183-day period prior to the stroke hospitalization. Comorbidities in the PCNASP were characterized by varying level of missingness: information on prior ischemic stroke, transient ischemic attack, obesity, chronic kidney disease, drug or alcohol abuse, and depression was missing for 13.0%, 11.6%, 72.1%, 78.6%, 79.6% and 44.7%, respectively; information on the other comorbidities was missing for <1%.

<sup>2</sup> Information on NIH Stroke Scale and Ambulatory status at discharge was missing for 28.9% and 5.2% patients, respectively.

**Table 6. Percentage of missingness for PCNASP elements**

|                                                                | % missing |
|----------------------------------------------------------------|-----------|
| <b>Comorbidities<sup>1</sup>, N (%)</b>                        |           |
| Hypertension                                                   | 0.3       |
| Diabetes mellitus                                              | 0.7       |
| Dyslipidemia                                                   | 0.6       |
| Prior ischemic stroke                                          | 13.0      |
| Prior transient ischemic attack                                | 11.6      |
| History of atrial fibrillation                                 | 0.8       |
| Carotid stenosis                                               | 0.9       |
| Ischemic heart disease                                         | 0.8       |
| Peripheral vascular disease                                    | 0.9       |
| Congestive heart failure                                       | 0.9       |
| Chronic kidney disease                                         | 78.6      |
| Obesity                                                        | 72.1      |
| Smoking                                                        | 0.9       |
| Drug or alcohol abuse                                          | 79.6      |
| Depression                                                     | 44.7      |
| <b>Medications reported upon admission</b>                     |           |
| Antihypertensive drugs <sup>2</sup>                            | 0.2       |
| Lipid-lowering drugs <sup>3</sup>                              | 0.0       |
| <b>Stroke severity and functional information at discharge</b> |           |
| NIH Stroke Scale                                               | 28.9      |
| Ambulatory status at discharge                                 | 5.2       |
| <b>Medications prescribed at discharge</b>                     |           |
| Antihypertensive drugs <sup>2</sup>                            | 11.3      |
| Statins                                                        | 1.7       |

1. Based on recorded medical history during stroke hospitalization

2. Antihypertensive drugs: includes ACE-inhibitors, ARBs, beta-blockers, calcium channel blockers, thiazide diuretics, loop diuretics, and other antihypertensives

3. Lipid-lowering drugs: includes statins or other lipid-lowering medications.

**Figure 1. Antihypertensive and lipid-lowering medication use prior and subsequent to index stroke hospitalization as measured in PCNASP and in claims at 90 days pre-stroke and 90 days post discharge among linked patients less than 65 years and 65-year old and older**

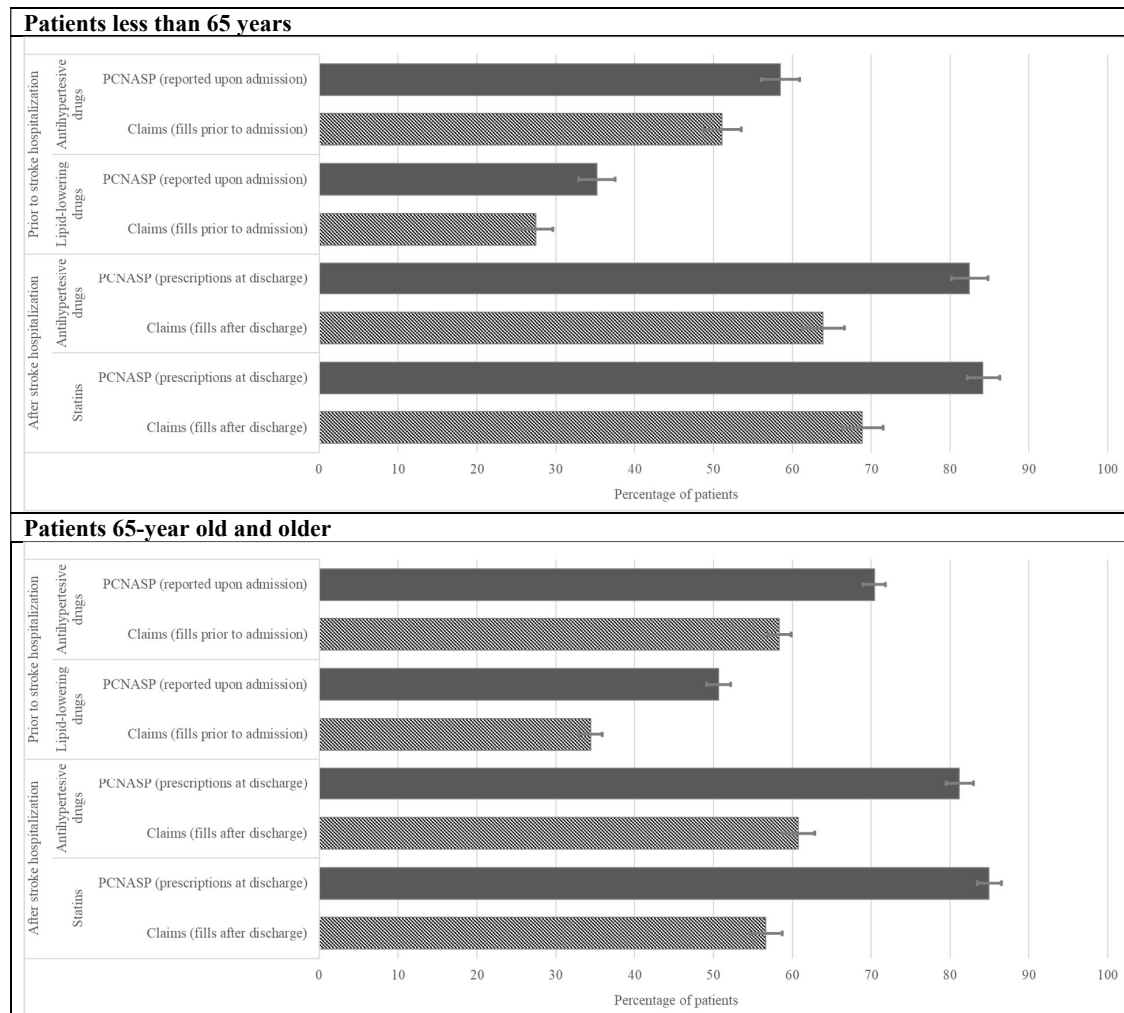

PCNASP (reported upon admission): based on medications reported upon admission in PCNASP registry.

Claims (fills prior to admission): based on prescription medications filled in the 90 days prior to the stroke hospitalization in claims.

PCNASP (prescription at discharge): based on medications prescribed at discharge in PCNASP among patients discharged home.

Claims (fills after discharge): based on prescription medications filled in the 90 days following discharge as recorded in claims among patients discharged home. To evaluate prescription medications filled following discharge in claims, analyses were limited to patients with continuous enrollment for the 90 days after the stroke hospitalization.

Antihypertensive drugs: includes ACE-inhibitors, ARBs, beta-blockers, calcium channel blockers, thiazide diuretics, loop diuretics, and other antihypertensives

Lipid-lowering drugs: includes statins or other lipid-lowering medications. PCNASP included information on the use of lipid-lowering drugs upon admission and on the prescription of statins at discharge.

**Figure 2. Antihypertensive and lipid-lowering medication use prior and subsequent to index stroke hospitalization as measured in PCNASP and in claims at 90 days pre-stroke and 90 days post discharge among linked commercially-insured and Medicare Advantage insured patients**

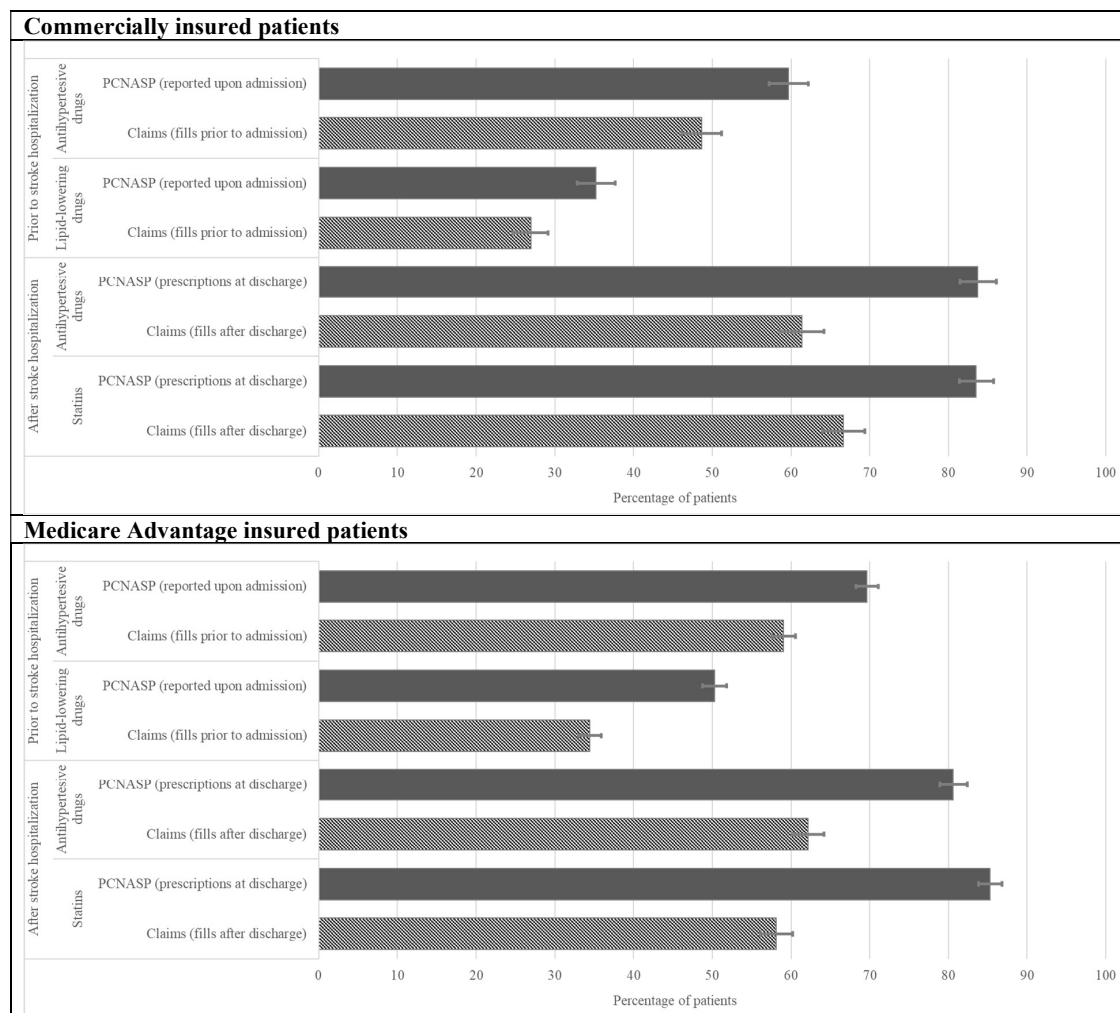

PCNASP (reported upon admission): based on medications reported upon admission in PCNASP registry,  
 Claims (fills prior to admission): based on prescription medications filled in the 90 days prior to the stroke hospitalization in claims.  
 PCNASP (prescription at discharge): based on medications prescribed at discharge in PCNASP among patients discharged home.  
 Claims (fills after discharge): based on prescription medications filled in the 90 days following discharge as recorded in claims among patients discharged home. To evaluate prescription medications filled following discharge in claims, analyses were limited to patients with continuous enrollment for the 90 days after the stroke hospitalization.  
 Antihypertensive drugs: includes ACE-inhibitors, ARBs, beta-blockers, calcium channel blockers, thiazide diuretics, loop diuretics, and other antihypertensives  
 Lipid-lowering drugs: includes statins or other lipid-lowering medications. PCNASP included information on the use of lipid-lowering drugs upon admission and on the prescription of statins at discharge.
